# Supplementary material for: Size-dependent photocatalytic reduction of CO2 with PbS quantum dot sensitized TiO2 heterostructured photocatalysts
Source: Royal Society of Chemistry journal article supplement (doi:10.1039/c1jm12367j), 2011-01-01
Supplement: c1jm12367j.pdf [file c1jm12367j.pdf]

## Size-dependent Photocatalytic Reduction of CO<sub>2</sub> with PbS Quantum Dot Sensitized TiO<sub>2</sub> Heterostructured Photocatalysts†

Congjun Wang,<sup>\*a,b</sup> Robert L. Thompson,<sup>a,b</sup> Paul Ohodnicki,<sup>a</sup> John Baltrus<sup>a</sup> and Christopher Matranga<sup>a</sup>

*Electronic Supplementary Information*

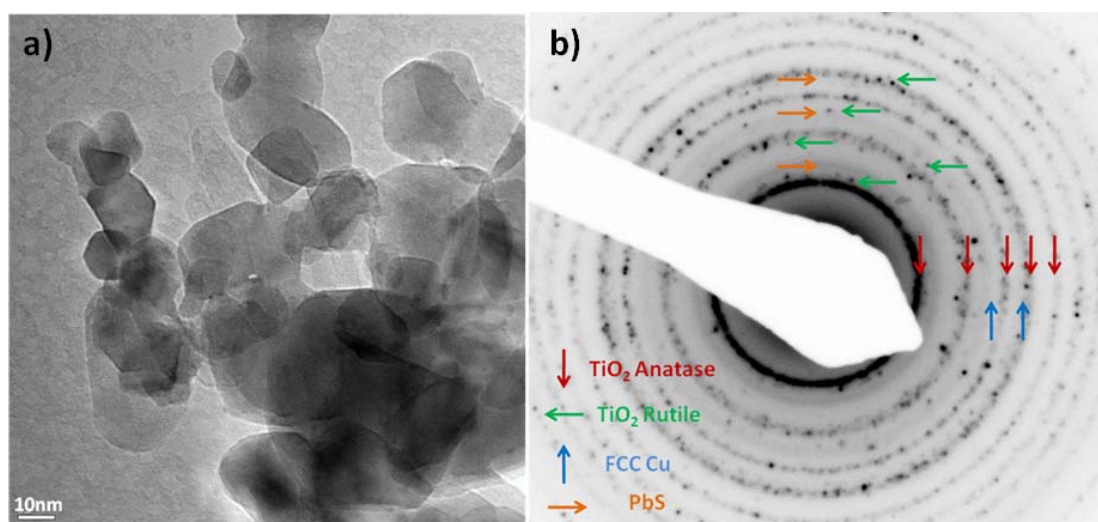

**Fig. S1** (a) Conventional TEM image of 4 nm PbS QD sensitized Cu/TiO<sub>2</sub> photocatalysts and (b) corresponding selected area diffraction pattern showing evidence for all expected phases (TiO<sub>2</sub> Anatase, TiO<sub>2</sub> Rutile, FCC Cu, and FCC PbS). The PbS QDs and Cu particles are difficult to identify unambiguously in conventional TEM images but regions that can be indexed according to these phases have been identified in high resolution TEM images.
